# Supplementary material for: Negligible Toxicokinetic Differences of Glyphosate by Different Vehicles in Rats
Source: MDPI journal article supplement (doi:10.3390/toxics11010067), 2023-01-11
Supplement: s1 [file s1]

# Supplementary Materials: Toxicokinetic Properties of Glyphosate, a Vehicle-Dependent Herbicide, in Rats

Yu-Jin Kim, Kyu-Bong Kim

**Table S1.** Analytical LC condition of glyphosate and AMPA.

| Instrument                   |                                                 |    |
|------------------------------|-------------------------------------------------|----|
| HPLC                         | Agilent Infinity 1290 LC                        |    |
| Column                       | Hypercarb column (100 × 2.1 mm, 5 μm)           |    |
| Guard column                 | Security Guard Cartridges RP-1 (4 × 3.0 mm)     |    |
| LC condition                 |                                                 |    |
| Mobile Phase                 | A: 5 mM ammonium acetate in DW (1% formic acid) |    |
|                              | B: ACN (1% formic acid)                         |    |
| Column oven temperature (°C) | 25                                              |    |
| Autosampler temperature (°C) | 4                                               |    |
| Flow rate (mL/min)           | 0.3                                             |    |
| Running time (min)           | 10                                              |    |
| Injection volume (μl)        | 10                                              |    |
| Gradient condition           |                                                 |    |
| Time (min)                   | A                                               | B  |
| 0                            | 80                                              | 20 |
| 2.5                          | 80                                              | 20 |
| 6                            | 20                                              | 80 |
| 8                            | 20                                              | 80 |
| 9                            | 80                                              | 20 |
| 10                           | 80                                              | 20 |

**Table S2.** Optimized MS/MS parameters of glyphosate, AMPA and 4-hydroxyacetanilide (IS) and analytical MS/MS condition.

| Compound                  | ESI mode | Precursor ion<br>(m/z)              | Product ion<br>(m/z) | CE * (V) | DP ** (V) |
|---------------------------|----------|-------------------------------------|----------------------|----------|-----------|
| Glyphosate                | Negative | 168                                 | 62.8                 | -30      | -55       |
|                           |          | 168                                 | 78.8                 | -60      |           |
| AMPA                      | Negative | 109.9                               | 63                   | -24      | -25       |
|                           |          | 109.9                               | 78.8                 | -38      |           |
| 4-hydroxyacetanilide (IS) | Positive | 152.1                               | 110.2                | 23       | 41        |
| MS/MS Instrument          |          | AB SCIEX API 4000                   |                      |          |           |
| MS/MS condition           |          |                                     |                      |          |           |
| Curtain gas (L/min)       |          |                                     | 20                   |          |           |
| Ion spray voltage (V)     |          | - 4200 (negative) / 4200 (positive) |                      |          |           |
| Ion source gas 1 (L/min)  |          |                                     | 50                   |          |           |
| Ion source gas 2 (L/min)  |          |                                     | 55                   |          |           |
| Source temperature (°C)   |          |                                     | 550                  |          |           |

CE \*: Collision energy; DP \*\*: Declustering potential

**Table S3.** Accuracy, precision and linearity at LLOQ of glyphosate and AMPA (0.5 µg/mL) (n=5).

| n                                        | Concentration (µg/mL) | Glyphosate  | AMPA        |
|------------------------------------------|-----------------------|-------------|-------------|
| 1                                        | 0.5                   | 0.50        | 0.41        |
| 2                                        |                       | 0.59        | 0.48        |
| 3                                        |                       | 0.58        | 0.59        |
| 4                                        |                       | 0.60        | 0.59        |
| 5                                        |                       | 0.58        | 0.57        |
| Mean ± SD                                |                       | 0.57 ± 0.04 | 0.53 ± 0.08 |
| Accuracy (%) <sup>1</sup>                |                       | 113.40      | 105.20      |
| Precision (%) <sup>2</sup>               |                       | 7.00        | 14.90       |
| Linearity (r <sup>2</sup> ) <sup>3</sup> |                       | 0.9995      | 0.9996      |

Accuracy (%)<sup>1</sup> (measured concentration/nominal concentration) × 100; Precision (%)<sup>2</sup> (standard deviation / mean) × 100; Linearity (r<sup>2</sup>)<sup>3</sup> correlation coefficient

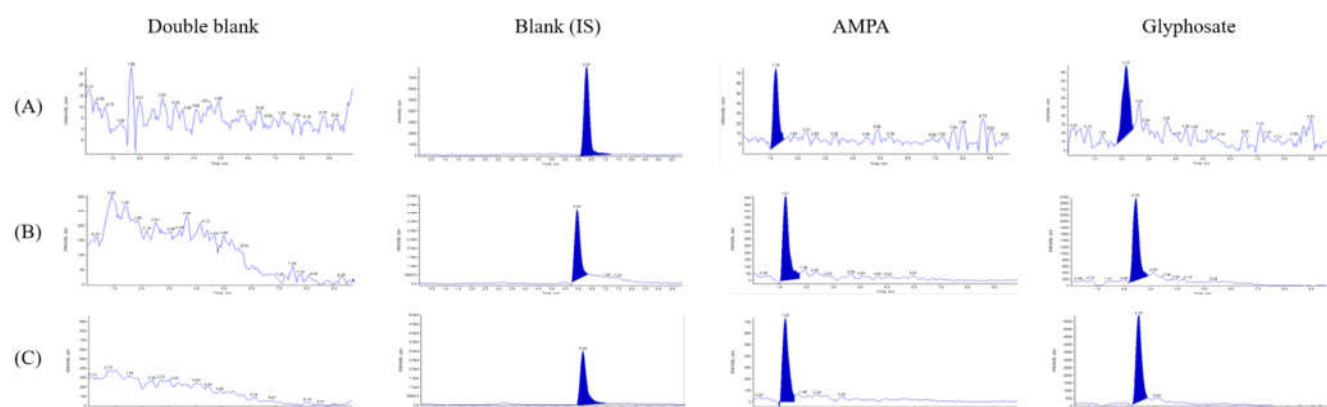

**Figure S1.** Representative MRM chromatograms of glyphosate, AMPA and 4-hydroxyacetanilide (internal standard, IS) obtained at LLOQ (0.5  $\mu\text{g/mL}$ ) in plasma (A), liver (B) and kidney (C).
